# Supplementary material for: Degradation of ibuprofen and acetylsulfamethoxazole by multi-walled carbon nanotube catalytic ozonation: surface properties, kinetics and modeling
Source: Royal Society of Chemistry journal article supplement (doi:10.1039/c9ew00492k), 2019-01-01
Supplement: c9ew00492k1.pdf [file c9ew00492k1.pdf]

## **Electronic Supplementary Information**

### **Degradation of Ibuprofen and Acetylsulfamethoxazole by multi-walled Carbon Nanotube Catalytic Ozonation: Surface properties, kinetics and modeling**

Mao-Shu Du<sup>1</sup>, Kuan-Po Chen<sup>1</sup> and Yi-Pin Lin<sup>1,2 \*</sup>

<sup>1</sup>Graduate Institute of Environmental Engineering, National Taiwan University,  
Taipei 10673, Taiwan

<sup>2</sup>NTU Research Center for Future Earth, National Taiwan University, Taipei 10673,  
Taiwan

\* Corresponding author

E-mail address: [yipinlin@ntu.edu.tw](mailto:yipinlin@ntu.edu.tw); Tel.: 02-33664380

**Text S1: Method for the determination of rate constants for a macromolecule simultaneously reacting with ozone and serving as the initiator, promoter and inhibitor in the OH<sup>•</sup> chain reactions in water ozonation**

The approach described by Yong and Lin<sup>1, 2</sup> integrated the following three classical models for water ozonation:

1. The transient steady-state concentration of OH<sup>•</sup>:

$$[\cdot\text{OH}] = \frac{2k_1[\text{OH}^-] + \sum k_{I,i}[\text{M}_{I,i}]}{\sum k_{S,i}[\text{M}_{S,i}]} [\text{O}_3] \quad (\text{S1})$$

where  $[\cdot\text{OH}]$  represents the transient steady-state concentration of OH<sup>•</sup>;  $k_1$  represents the 2<sup>nd</sup>-order rate constant between OH<sup>•</sup> and ozone;  $[\text{M}_{I,i}]$  and  $k_{I,i}$  represent the concentration of the initiator and its 2<sup>nd</sup>-order rate constant with O<sub>3</sub>;  $[\text{M}_{S,i}]$  and  $k_{S,i}$  represent the concentration of the inhibitor and its 2<sup>nd</sup>-order rate constant with OH<sup>•</sup>, respectively.

2. The R<sub>ct</sub> concept<sup>4</sup>:

$$R_{\text{ct}} = \frac{\int [\cdot\text{OH}] dt}{\int [\text{O}_3] dt} = - \frac{\ln \frac{[\text{pCBA}]_t}{[\text{pCBA}]_0}}{k_{\cdot\text{OH}/\text{pCBA}} \int [\text{O}_3] dt} \quad (\text{S2})$$

3. Pseudo-1<sup>st</sup> order ozone decomposition kinetics<sup>3</sup>:

$$\begin{aligned} - \frac{d[\text{O}_3]}{dt} \frac{1}{[\text{O}_3]} &= k_{\text{obs}} \\ &= 3k_1[\text{OH}^-] + k_D[\text{M}_{D,i}] + k_I[\text{M}_{I,i}] + k_P[\text{M}_{P,i}] \left( \frac{2k_1[\text{OH}^-] + \sum k_{I,i}[\text{M}_{I,i}]}{\sum k_{S,i}[\text{M}_{S,i}]} \right) \end{aligned} \quad (\text{S3})$$

Eq (S1) can be substituted to Eq (S2) to yield Eq (S4) assuming that pH value (or [OH<sup>-</sup>]) and the concentrations of initiator ([M<sub>I,i</sub>]) and inhibitor ([M<sub>S,i</sub>]) do not change during the ozonation.

$$R_{\text{ct}} = \frac{\int \left( \frac{2k_1[\text{OH}^-] + \sum k_{I,i}[\text{M}_{I,i}]}{\sum k_{S,i}[\text{M}_{S,i}]} \right) [\text{O}_3] dt}{\int [\text{O}_3] dt} = \frac{2k_1[\text{OH}^-] + \sum k_{I,i}[\text{M}_{I,i}]}{\sum k_{S,i}[\text{M}_{S,i}]} \quad (\text{S4})$$

Assuming that MWCNT can simultaneously react with ozone and serve as the initiator, promoter and inhibitor in the OH<sup>•</sup> chain reactions, Eq (S4) can be rewritten as Eq (S5) with the addition of *tert*-butanol as an external inhibitor (denoted as S with a rate constant of k<sub>SS</sub> with OH<sup>•</sup>) in the system<sup>1</sup>.

$$R_{\text{ct}} = \frac{2k_1[\text{OH}^-] + k_I[\text{MWCNT}]}{k_{SS}[\text{S}] + k_S[\text{MWCNT}]} \quad (\text{S5})$$

where  $k_I$  represents the initiation rate constant of MWCNT (unit: L(mg CNT)<sup>-1</sup>s<sup>-1</sup>),  $k_S$  represents the inhibition rate constant of MWCNT (unit: L(mg CNT)<sup>-1</sup>s<sup>-1</sup>),  $k_{SS}$  represents the 2<sup>nd</sup>-order rate constant between *tert*-butanol and OH<sup>•</sup> ( $k_{SS}=6.0 \times 10^8$

$M^{-1}s^{-1})$ .<sup>5</sup>

The reciprocal of Eq (S5) gives Eq (S6).

$$\frac{1}{R_{ct}} = \frac{k_{SS}[S] + k_S[MWCNT]}{2k_1[OH^-] + k_I[MWCNT]} \quad (S6)$$

Ideally, a linear relationship exists between  $\frac{1}{R_{ct}}$  and  $k_{SS}[S]$  as shown below.  $k_I$  and  $k_S$  can then be determined from the slope and intercept, respectively.

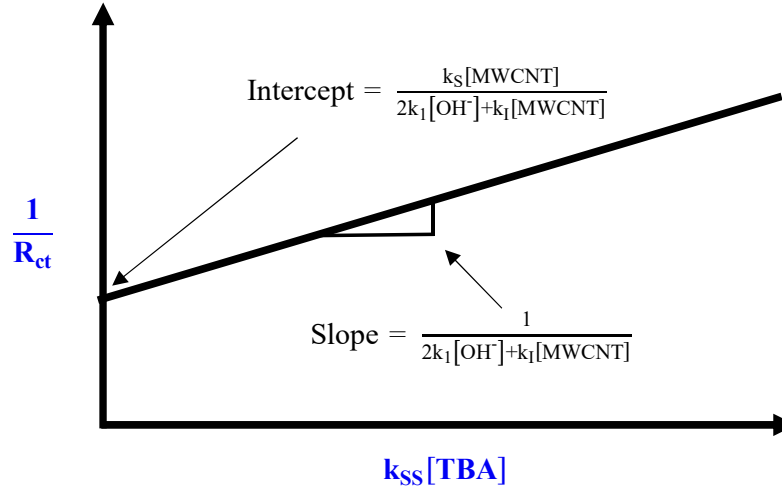

In the same system, substituting Eq (S3) to Eq (S1) gives Eq (S7):

$$-\frac{d[O_3]}{dt} \frac{1}{[O_3]} = k_{obs} = 3k_1[OH^-] + k_D[MWCNT] + k_I[MWCNT] + k_p[MWCNT]R_{ct} \quad (S7)$$

where  $k_D$  represented the direct reaction rate constant of MWCNT,  $k_p$  represented the promotion rate constants of MWCNT (unit:  $L(mg\ CNT)^{-1}s^{-1}$ ).

A linear relationship should exist between  $k_{obs}$  and  $R_{ct}$  as shown below.  $k_p$  and  $k_D$  can then be determined from the slope and intercept, respectively.

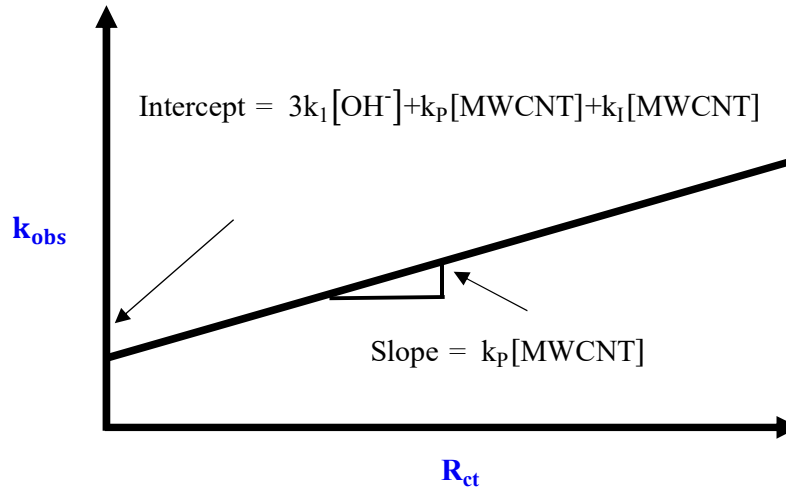

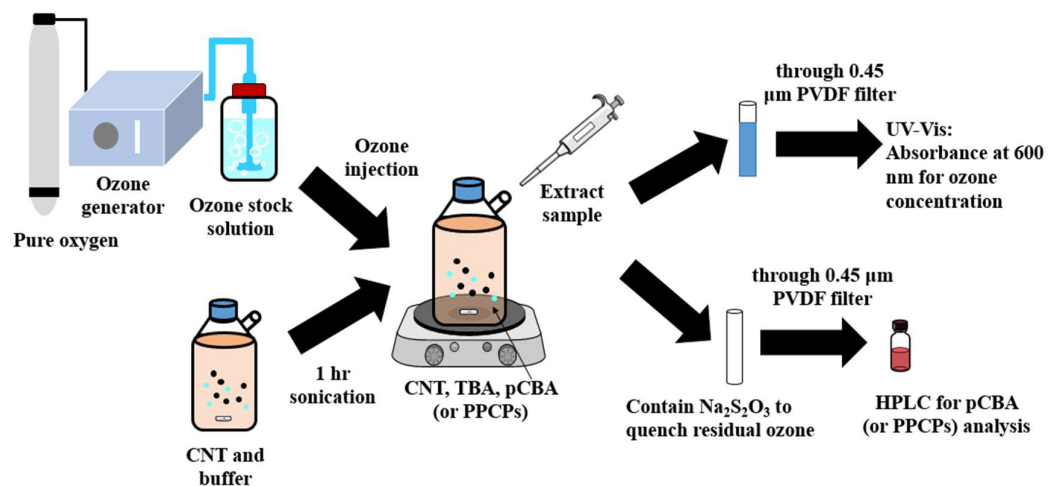

Figure S1. Schematic diagram of ozone experiments



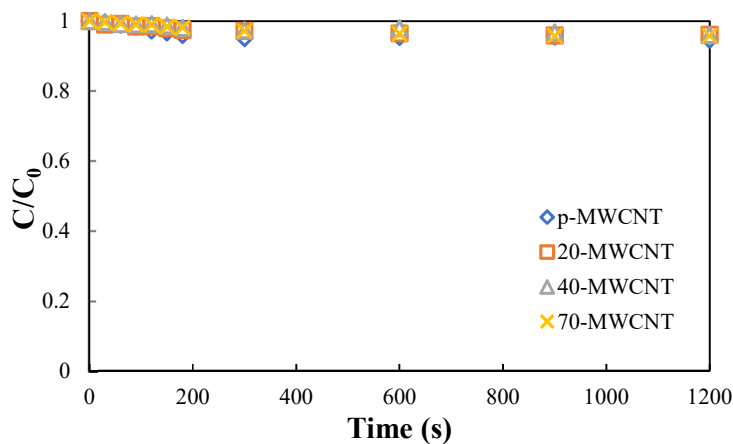

Figure S3. Adsorption of pCBA onto the 4 MWCNTs. Experimental condition:  $[pCBA]_0 = 0.5 \mu M$ ,  $[B_4O_7^{2-}] = 5 mM$ , MWCNT dosage = 20 mg/L, pH = 7.

## References

1. E. L. Yong and Y. P. Lin, Kinetics of natural organic matter as the initiator, promoter, and inhibitor, and their influences on the removal of ibuprofen in ozonation, *Ozone Sci. Eng*, 2013, **35**, 472-481.
2. E. L. Yong and Y. P. Lin, Incorporation of initiation, promotion and inhibition in the Rct concept and its application in determining the initiation and inhibition capacities of natural water in ozonation, *Water Res*, 2012, **46**, 1990-1998.
3. J. Staehelin and J. Hoigné, Decomposition of ozone in water in the presence of organic solutes acting as promoters and inhibitors of radical chain reactions, *Environ. Sci. Technol*, 1985, **19**, 1206-1213.
4. M. Elovitz and U. von Gunten, Hydroxyl radical/ozone ratios during ozonation process I. The Rct Concept, *Ozone Sci. Eng*, 1999, **21**, 239-260.
5. G. V. Buxton, C. L. Greenstock, W. P. Helman and A. B. Ross, Critical review of rate constants for reactions of hydrated electrons, hydrogen-atoms and hydroxyl radicals in aqueous solution, *J. Phys. Chem. Ref. Data*, 1988, **17**, 513-886.
